# Supplementary material
Source: PubMed Central journal article supplement (PMC9257888)
Supplement: NIHMS897788-supplement-1.pdf [file NIHMS897788-supplement-1.pdf]

**Supplemental Table S1. Severity Grading in Drug Induced Liver Injury from LiverTox Produced by Acquired Immune Deficiency Syndromes Clinical Trials Group (AIDS CTG)**

| <b>Feature</b>             | <b>ULN</b> | <b>Grade 0</b> | <b>Grade 1</b> | <b>Grade 2</b> | <b>Grade 3</b> | <b>Grade 4</b> |
|----------------------------|------------|----------------|----------------|----------------|----------------|----------------|
| Alanine aminotransferase   | 60 U/L     | <1.25          | 1.25-2.5       | >2.5-5.0       | >5.0-10        | >10            |
| Aspartate aminotransferase | 35 U/L     | <1.25          | 1.25-2.5       | >2.5-5.0       | >5.0-10        | >10            |
| Alkaline phosphatase       | 130 U/L    | <1.25          | 1.25-2.5       | >2.5-5.0       | >5.0-10        | >10            |
| Total Bilirubin            | 1.2 mg/dl  | ≤1.00          | >1.0-1.5       | >1.5-2.5       | >2.5-5         | >5             |

ULN, upper limit of normal range.
