# Supplementary material
Source: PubMed Central journal article supplement (PMC9257888)
Supplement: NIHMS897788-supplement-2.pdf [file NIHMS897788-supplement-2.pdf]

**Supplemental Table S2. Baseline mean concentrations of alanine aminotransferase (ALT) and aspartate aminotransferase (AST) in all participants and in subgroups stratified by selected baseline characteristics of study participants by treatment status (GTE or placebo), the Minnesota Green Tea Trial, 2009-2015**

| Stratifying variables at baseline               | ALT (U/L), mean (95% CI) |                  |            | AST (U/L), mean (95% CI) |                  |            |
|-------------------------------------------------|--------------------------|------------------|------------|--------------------------|------------------|------------|
|                                                 | Placebo                  | GTE              | <i>P</i> * | Placebo                  | GTE              | <i>P</i> * |
| Mean enzyme levels at baseline                  | 18.0 (17.5-18.7)         | 17.6 (17.0-18.7) | 0.25       | 20.7 (20.2-21.2)         | 20.0 (19.6-20.4) | 0.04       |
| Mean enzyme levels within stratified categories |                          |                  |            |                          |                  |            |
| BMI (kg/m <sup>2</sup> )                        |                          |                  |            |                          |                  |            |
| <25                                             | 17.5 (16.0- 18.9)        | 17.6 (16.1-19.0) | 0.85       | 21.3 (20.2-22.4)         | 20.6 (19.6-21.7) | 0.16       |
| 25-<30                                          | 18.9 (17.4-20.4)         | 18.4 (16.8-20.0) | 0.47       | 20.6 (19.5-21.8)         | 20.1 (18.8-21.2) | 0.32       |
| ≥30                                             | 20.9 (18.7-23.2)         | 17.8 (15.7-19.8) | 0.01       | 20.6(18.9-22.4)          | 19.4 (17.9-21.0) | 0.23       |
| <i>P</i> *                                      | 0.01                     | 0.46             |            | 0.39                     | 0.21             |            |
| Current alcohol drinker                         |                          |                  |            |                          |                  |            |
| No                                              | 19.1 (17.2-20.9)         | 17.6 (15.8-19.4) | 0.15       | 22.4 (21.0-23.8)         | 19.7 (18.4-21.1) | 0.001      |
| Yes                                             | 18.3 (16.9-19.6)         | 18.0 (16.6-19.3) | 0.55       | 20.6 (19.6-21.6)         | 20.3 (19.3-21.3) | 0.42       |
| <i>P</i> *                                      | 0.34                     | 0.59             |            | 0.01                     | 0.36             |            |
| Baseline blood cholesterol level (mg/dl)        |                          |                  |            |                          |                  |            |
| <200                                            | 18.5 (17.0-20.1)         | 18.0 (16.5-19.5) | 0.47       | 21.0 (19.8-22.2)         | 20.2 (19.1-21.4) | 0.16       |
| 200-239                                         | 18.2 (16.7-19.7)         | 18.3 (16.7-19.8) | 0.90       | 21.0 (19.9-22.2)         | 20.4 (19.2-21.6) | 0.24       |
| >240                                            | 17.5 (15.4-19.5)         | 15.8 (13.8-17.9) | 0.18       | 20.3 (18.8-21.9)         | 19.2 (17.6-20.8) | 0.24       |
| <i>P</i> *                                      | 0.53                     | 0.05             |            | 0.60                     | 0.30             |            |
| Baseline blood triglyceride level (mg/dl)       |                          |                  |            |                          |                  |            |
| <150                                            | 17.9 (16.6-19.3)         | 17.6 (16.2-18.9) | 0.49       | 21.1 (20.0-22.1)         | 20.1 (19.0-21.1) | 0.01       |
| ≥150                                            | 19.8 (17.7-21.9)         | 19.7 (17.4-22.0) | 0.93       | 19.7 (18.1-21.3)         | 20.8 (19.1-22.6) | 0.29       |
| <i>P</i> *                                      | 0.05                     | 0.06             |            | 0.07                     | 0.37             |            |
| Current use of aspirin                          |                          |                  |            |                          |                  |            |
| No                                              | 18.3 (16.9-19.7)         | 17.9 (16.5-19.2) | 0.37       | 21.1 (20.0-22.1)         | 20.3 (19.3-21.4) | 0.06       |
| Yes                                             | 18.6 (17.0-20.2)         | 18.1 (16.5-19.8) | 0.62       | 20.7 (19.5-21.9)         | 20.2 (18.9-21.4) | 0.39       |
| <i>P</i> *                                      | 0.72                     | 0.68             |            | 0.50                     | 0.74             |            |
| Current use of non-aspirin NSAIDs               |                          |                  |            |                          |                  |            |
| No                                              | 19.2 (17.7-20.8)         | 17.0 (15.4-18.6) | 0.003      | 21.1 (19.9-22.3)         | 20.3 (19.1-21.5) | 0.18       |
| Yes                                             | 18.0 (16.6-19.3)         | 18.4 (17.0-19.7) | 0.42       | 20.9 (19.8-21.9)         | 20.3 (19.2-21.3) | 0.13       |
| <i>P</i> *                                      | 0.05                     | 0.03             |            | 0.68                     | 0.94             |            |

(Supplemental Table S2 continued)

|                              | ALT (U/L), mean (95% CI) |                  |            | AST (U/L), mean (95% CI) |                  |            |
|------------------------------|--------------------------|------------------|------------|--------------------------|------------------|------------|
|                              | Placebo                  | GTE              | <i>P</i> * | Placebo                  | GTE              | <i>P</i> * |
| Current use of acetaminophen |                          |                  |            |                          |                  |            |
| No                           | 18.7 (17.3-20.0)         | 18.1 (16.7-19.5) | 0.26       | 21.0 (20.0-22.0)         | 20.3 (19.3-21.4) | 0.07       |
| Yes                          | 17.7 (16.0-19.3)         | 17.6 (16.0-19.2) | 0.95       | 20.8 (19.5-22.0)         | 20.2 (19.0-21.4) | 0.36       |
| <i>P</i> *                   | 0.14                     | 0.48             |            | 0.62                     | 0.81             |            |
| Current use of statin        |                          |                  |            |                          |                  |            |
| No                           | 17.9 (16.6-19.3)         | 17.3 (15.9-18.6) | 0.18       | 20.8 (19.8-21.8)         | 19.8 (18.8-20.8) | 0.01       |
| Yes                          | 19.6 (17.9-21.3)         | 19.8 (18.1-21.5) | 0.84       | 21.2 (19.9-22.5)         | 21.6 (20.3-22.9) | 0.57       |
| <i>P</i> *                   | 0.03                     | 0.001            |            | 0.47                     | 0.002            |            |

CI, confidence interval; BMI, body mass index; GTE, green tea extract; NSAIDs, non-steroidal anti-inflammatory drugs.

\*2-sided *P* values were derived from generalized linear models comparing the baseline liver enzymes (ALT or AST) between treatment groups, or between different categories of stratifying variable within placebo/GTE group after adjustments for age, smoking status and level of education.
