# Supplementary material
Source: PubMed Central journal article supplement (PMC9257888)
Supplement: NIHMS897788-supplement-3.pdf [file NIHMS897788-supplement-3.pdf]

**Supplemental Table S3. Distributions of characteristics at baseline among study participants in the green tea extract group with and without Alanine Aminotransferase (ALT) greater than 75 U/L, The Minnesota Green Tea Trial, 2009-2015**

| Characteristics                                 | Normal ALT<br>(<75 U/L)      | Abnormal ALT<br>(≥75U/L)    | <i>P</i> <sup>a</sup> |
|-------------------------------------------------|------------------------------|-----------------------------|-----------------------|
| <b>No. of total subjects, n (%)</b>             | <b>469 (100)<sup>b</sup></b> | <b>44 (100)<sup>b</sup></b> |                       |
| Age at baseline (year), mean (SD)               | 60.0 (5.0)                   | 59.1 (4.5)                  | 0.25                  |
| Caucasian race, n (%) <sup>b</sup>              | 458 (98.1)                   | 43 (97.7)                   | 0.87                  |
| Level of education, n (%)                       |                              |                             | 0.47                  |
| High school or below                            | 28 (6.0)                     | 2 (4.6)                     |                       |
| Some College                                    | 97 (20.8)                    | 13 (29.6)                   |                       |
| College Graduate                                | 209 (44.8)                   | 20 (45.5)                   |                       |
| Postgraduate/Professional Degree                | 133 (28.5)                   | 9 (20.5)                    |                       |
| Body Mass Index (kg/m <sup>2</sup> ), mean (SD) | 25.2 (3.7)                   | 25.2 (4.4)                  | 0.95                  |
| <30, n (%)                                      | 410 (87.4)                   | 37 (84.1)                   | 0.53                  |
| ≥30, n (%)                                      | 59 (12.6)                    | 7 (15.9)                    |                       |
| Former smokers, n (%)                           | 136 (32.6)                   | 13 (32.5)                   | 0.99                  |
| No. years of quitting smoking, mean (SD)        | 25.5 (10.4)                  | 28.6 (8.6)                  | 0.29                  |
| Current use of alcohol, n (%)                   | 378 (80.6)                   | 32 (72.7)                   | 0.22                  |
| No. of drinks per week, mean (SD)               | 3.4 (3.0)                    | 2.8 (2.8)                   | 0.28                  |
| Current use of aspirin, n (%)                   | 126 (26.9)                   | 10 (22.7)                   | 0.55                  |
| Current use of non-aspirin NSAIDs, n (%)        | 321 (68.6)                   | 33 (75.0)                   | 0.38                  |
| Current use of acetaminophen, n (%)             | 139 (29.7)                   | 11 (25.0)                   | 0.52                  |
| Current use of statin, n (%)                    | 102 (21.8)                   | 13 (29.6)                   | 0.24                  |
| Total cholesterol (mg/dl), mean (SD)            | 207.2 (30.8)                 | 197.0 (26.0)                | 0.07                  |
| <200, n (%)                                     | 182 (42.4)                   | 15 (48.4)                   | 0.73                  |
| 200-240, n (%)                                  | 187 (43.6)                   | 13 (41.9)                   |                       |
| >240, n (%)                                     | 60 (14.0)                    | 3 (9.7)                     |                       |
| Total triglyceride (mg/dl), mean (SD)           | 94.3 (43.7)                  | 83.5 (35.2)                 | 0.18                  |
| <150, n (%)                                     | 385 (89.7)                   | 29 (93.6)                   | 0.50                  |
| ≥150, n (%)                                     | 44 (10.2)                    | 2 (6.4)                     |                       |
| Baseline ALT (U/L), mean (SD)                   | 17.3 (6.3)                   | 20.8 (9.7)                  | 0.02                  |
| Baseline AST (U/L), mean (SD)                   | 19.8 (4.6)                   | 22.1 (7.8)                  | 0.05                  |
| Baseline AKP (U/L), mean (SD)                   | 69.3 (18.8)                  | 67.4 (22.5)                 | 0.54                  |
| Baseline total bilirubin (mg/dl), mean (SD)     | 0.5 (0.2)                    | 0.5 (0.2)                   | 0.56                  |

GTE, green tea extract; SD, standard deviation; NSAIDs, non-steroidal anti-inflammatory drugs; AST, Aspartate Aminotransferase; AKP, Alkaline Phosphatase

<sup>a</sup> 2-sided *P* values were derived from t-test for the difference in means, and chi-squared test for difference in frequencies between the two groups.

<sup>b</sup> The sum of some variables may be less than the total due to missing values.
