# Supplementary material
Source: PubMed Central journal article supplement (PMC9257888)
Supplement: NIHMS897788-supplement-4.pdf [file NIHMS897788-supplement-4.pdf]

**Supplemental Table S4. The grading of alanine aminotransferase (ALT) during the 12-month treatment period by the level of baseline liver function tests (LFTs) and the interaction with treatment assignment (GTE or Placebo), the Minnesota Green Tea Trial, 2009-2015**

|                                                              | Placebo | GTE | <i>P</i> <sup>a</sup> | <i>Pint</i> <sup>a</sup> |
|--------------------------------------------------------------|---------|-----|-----------------------|--------------------------|
| Participants with all LFTs below ULN at baseline             | 487     | 490 |                       |                          |
| Highest level of ALT during the intervention period          |         |     |                       |                          |
| Normal, Grade 0 (<75 U/L)                                    | 480     | 451 | <0.0001               |                          |
| Abnormal (≥75U/L)                                            |         |     |                       |                          |
| Grade 1 (75-150 U/L)                                         | 7       | 23  |                       |                          |
| Grade 2 or above (>150 U/L)                                  | 0       | 16  |                       | 0.41                     |
| Participants with any LFT above ULN <sup>b</sup> at baseline | 21      | 23  |                       |                          |
| Highest level of ALT during the intervention period          |         |     |                       |                          |
| Normal, Grade 0 (<75 U/L)                                    | 19      | 18  | 0.27                  |                          |
| Abnormal (≥75U/L)                                            |         |     |                       |                          |
| Grade 1 (75-150 U/L)                                         | 2       | 4   |                       |                          |
| Grade 2 or above (>150-300 U/L)                              | 0       | 1   |                       |                          |

<sup>a</sup> 2-sided *P* values were derived from unconditional logistic regression model. ULN, upper limit of normal.

<sup>b</sup> ULN for all 4 liver function tests (LFTs) including alanine aminotransferase (ALT), aspartate aminotransferase (AST), alkaline phosphate (AKP), and total bilirubin, were defined in Supplemental Table S1.
