# Supplementary material
Source: PubMed Central journal article supplement (PMC9257888)
Supplement: NIHMS897788-supplement-5.pdf [file NIHMS897788-supplement-5.pdf]

**Supplemental Table S5. Change of serum alanine aminotransferase (ALT) and aspartate aminotransferase (AST) during the intervention period from baseline in subgroups stratified by selected baseline characteristics, the Minnesota Green Tea Trial, 2009-2015**

| Stratifying variable at baseline | ALT (U/L) |                            |     |                            |                       | <i>P</i> <sup>b</sup> | AST (U/L) |                            |     |                            |                       | <i>P</i> <sup>c</sup> |
|----------------------------------|-----------|----------------------------|-----|----------------------------|-----------------------|-----------------------|-----------|----------------------------|-----|----------------------------|-----------------------|-----------------------|
|                                  | Placebo   |                            | GTE |                            | <i>P</i> <sup>b</sup> |                       | Placebo   |                            | GTE |                            | <i>P</i> <sup>b</sup> |                       |
|                                  | No.       | Mean (95% CI) <sup>a</sup> | No. | Mean (95% CI) <sup>a</sup> |                       |                       | No.       | Mean (95% CI) <sup>a</sup> | No. | Mean (95% CI) <sup>a</sup> |                       |                       |
| Total triglyceride level (mg/dl) |           |                            |     |                            |                       | 0.9                   |           |                            |     |                            | 0.72                  |                       |
| <150                             | 409       | -0.9 (-2.3-0.5)            | 414 | 3.4 (2.0-4.8)              | <0.0001               |                       | 409       | -0.5 (-1.6-0.4)            | 414 | 2.3 (1.3-3.4)              | <0.0001               |                       |
| ≥150                             | 64        | 1.0 (-1.0-2.9)             | 46  | 5.4 (3.3-7.5)              | 0.001                 |                       | 64        | 1.1 (-0.4-2.5)             | 46  | 3.6 (2.1-5.2)              | 0.01                  |                       |
| <i>P</i> <sup>d</sup>            |           | 0.03                       |     | 0.03                       |                       |                       |           | 0.01                       |     | 0.07                       |                       |                       |
| Blood cholesterol level (mg/dl)  |           |                            |     |                            |                       | 0.71                  |           |                            |     |                            | 0.72                  |                       |
| <200                             | 189       | -1.0 (-2.5-0.5)            | 197 | 3.6 (2.1-5.1)              | <0.0001               |                       | 189       | -0.4 (-1.5-0.7)            | 197 | 2.5 (1.4-3.6)              | <0.0001               |                       |
| 200-240                          | 212       | -0.6 (-2.1-0.9)            | 200 | 3.4 (1.8-4.9)              | <0.0001               |                       | 212       | -0.4 (-1.5-0.7)            | 200 | 2.5 (1.4-3.6)              | <0.0001               |                       |
| >240                             | 72        | 0.8 (-1.1-2.7)             | 63  | 4.7 (2.8-6.7)              | 0.001                 |                       | 72        | 0.3 (-1.1-1.7)             | 63  | 2.6 (1.1-4.0)              | 0.01                  |                       |
| <i>P</i> <sup>d</sup>            |           | 0.7                        |     | 0.09                       |                       |                       |           | 0.75                       |     | 0.91                       |                       |                       |
| Current Use of Aspirin           |           |                            |     |                            |                       | 0.74                  |           |                            |     |                            | 0.85                  |                       |
| No                               | 367       | -0.4 (-2.2-1.4)            | 376 | 5.4 (3.6-7.2)              | <0.0001               |                       | 367       | -0.1 (-1.4-1.3)            | 376 | 3.8 (2.5-5.2)              | <0.0001               |                       |
| Yes                              | 140       | -0.6 (-2.6-1.3)            | 136 | 5.4 (3.5-7.4)              | <0.0001               |                       | 140       | -0.3 (-1.8-1.1)            | 136 | 3.7 (2.2-5.2)              | <0.0001               |                       |
| <i>P</i> <sup>c</sup>            |           | 0.68                       |     | 0.96                       |                       |                       |           | 0.59                       |     | 0.79                       |                       |                       |
| Current Use of Non-aspirin NSAID |           |                            |     |                            |                       | 0.003                 |           |                            |     |                            | 0.1                   |                       |
| No                               | 169       | -0.04 (-1.8-1.7)           | 158 | 6.3 (4.3-8.2)              | <0.0001               |                       | 169       | -0.4 (-1.3-1.3)            | 158 | 4.2 (2.8-5.7)              | <0.0001               |                       |
| Yes                              | 338       | -1.3 (-3.2-0.6)            | 354 | 5.0 (3.2-6.8)              | <0.0001               |                       | 338       | -0.5 (-1.9-1.0)            | 354 | 3.6 (2.4-5.0)              | <0.0001               |                       |
| <i>P</i> <sup>d</sup>            |           | 0.03                       |     | 0.04                       |                       |                       |           | 0.31                       |     | 0.19                       |                       |                       |

(Supplemental Table S5 continued)

|                              |     |                 |     |               |         |      |     |                 |     |               |         |      |
|------------------------------|-----|-----------------|-----|---------------|---------|------|-----|-----------------|-----|---------------|---------|------|
| Current Use of Acetaminophen |     |                 |     |               |         |      |     |                 |     |               |         | 0.99 |
| No                           | 370 | -0.8 (-2.5-1.0) | 362 | 5.3 (3.6-7.1) | <0.0001 | 0.23 | 370 | -0.3 (-1.6-1.1) | 362 | 3.7 (2.3-5.0) | <0.0001 |      |
| Yes                          | 137 | 0.4 (-1.5-2.4)  | 150 | 5.5 (3.5-7.4) | <0.0001 |      | 137 | 0.1 (-1.3-1.6)  | 150 | 4.1 (2.6-5.5) | <0.0001 |      |
| <i>P</i> <sup>d</sup>        |     | 0.06            |     | 0.82          |         |      |     | 0.41            |     | 0.4           |         |      |
| Current Use of Statin        |     |                 |     |               |         | 0.67 |     |                 |     |               |         | 0.36 |
| No                           | 401 | -0.4 (-2.2-1.4) | 397 | 5.3 (3.6-7.1) | <0.0001 |      | 401 | -0.1 (-1.9-1.2) | 397 | 3.7 (2.4-5.0) | <0.0001 |      |
| Yes                          | 106 | -0.6 (-2.6-1.4) | 115 | 5.6 (3.6-7.6) | <0.0001 |      | 106 | -0.4 (-1.9-1.2) | 115 | 4.1 (2.6-5.6) | <0.0001 |      |
| <i>P</i> <sup>d</sup>        |     | 0.82            |     | 0.72          |         |      |     | 0.63            |     | 0.44          |         |      |

GTE, green tea extract; BMI, body mass index; CI, confidence interval; NASID, Nonsteroidal anti-inflammatory drug; *COMT*, catechol-*O*-methyltransferase; All means are from Least Squares Means.

<sup>a</sup> Least squares mean changes in the 12-month treatment period over baseline level.

<sup>b</sup> 2-sided *P* values were derived from generalized linear mixed models comparing the changes of liver enzyme (ALT or AST) during the intervention period from baseline of women in the GTE group to the corresponding changes in the placebo group after adjustments for age, BMI, smoking status and level of education.

<sup>c</sup> 2-sided *P* values were derived from the same model assessing the interaction between the intervention (GTE or placebo) and the stratifying variables on the liver enzyme (ALT or AST) with the same adjustments.

<sup>d</sup> 2-sided *P* values were derived from the same model comparing the differences in changes of liver enzyme (ALT or AST) from baseline among different levels of stratifying variables within the GTE or placebo group.
