# Supplementary material
Source: PubMed Central journal article supplement (PMC9257888)
Supplement: NIHMS897788-supplement-6.pdf [file NIHMS897788-supplement-6.pdf]

(Supplemental Table S6 continued)

| ID  | Group | Row variable | Baseline test | Test 1 | Test 2           | Test 3           | Test 4           | Test 5           | Test 6           | Test 7            | Test 8            | Test 9          | Test 10          | Test 11 | Test 12          | Test 13          | Test 14 | Test 15 | Test 16 | Final status |                 |
|-----|-------|--------------|---------------|--------|------------------|------------------|------------------|------------------|------------------|-------------------|-------------------|-----------------|------------------|---------|------------------|------------------|---------|---------|---------|--------------|-----------------|
| G17 | GTE   | # Days*      | 0             | 30     | 61               | 99               | 128              | 147              | 160              |                   |                   |                 |                  |         |                  |                  |         |         |         |              | Withdrawal      |
|     |       | ALT          | 16            | 20     | 22               | 28               | 383 <sup>1</sup> | 399 <sup>†</sup> | 31               |                   |                   |                 |                  |         |                  |                  |         |         |         |              |                 |
| G18 | GTE   | # Days*      | 0             | 91     | 118              | 145              | 178              | 194              | 227              | 326               | 416               |                 |                  |         |                  |                  |         |         |         |              | Completed       |
|     |       | ALT          | 63            | 17     | 41               | 25               | 116 <sup>1</sup> | 19 <sup>†</sup>  | 22               | 26                | 20                | 63              |                  |         |                  |                  |         |         |         |              |                 |
| G19 | GTE   | # Days*      | 0             | 28     | 60               | 95               | 122              | 158              | 188              | 273               | 277               | 387             |                  |         |                  |                  |         |         |         |              | Withdrawal      |
|     |       | ALT          | 16            | 18     | 15               | 15               | 19               | 48               | 70               | 2055 <sup>1</sup> | 1762 <sup>†</sup> | 248             |                  |         |                  |                  |         |         |         |              |                 |
| G20 | GTE   | # Days*      | 0             | 31     | 60               | 91               | 138              | 159              | 175              | 273               | 290               | 367             |                  |         |                  |                  |         |         |         |              | Completed       |
|     |       | ALT          | 18            | 26     | 19               | 41               | 66               | 58               | 80               | 97 <sup>1</sup>   | 61 <sup>†</sup>   | 45              |                  |         |                  |                  |         |         |         |              |                 |
| G21 | GTE   | # Days*      | 0             | 28     | 58               | 90               | 122              | 153              | 183              | 275               | 290               | 307             | 364              |         |                  |                  |         |         |         |              | Completed       |
|     |       | ALT          | 15            | 13     | 12               | 14               | 15               | 15               | 23               | 116 <sup>1</sup>  | 92 <sup>†</sup>   | 48              | 70               |         |                  |                  |         |         |         |              |                 |
| G22 | GTE   | # Days*      | 0             | 28     | 56               | 94               | 121              | 151              | 182              | 277               | 294               | 371             |                  |         |                  |                  |         |         |         |              | Completed       |
|     |       | ALT          | 13            | 12     | 18               | 16               | 15               | 25               | 82               | 102 <sup>1</sup>  | 46 <sup>†</sup>   | 35              |                  |         |                  |                  |         |         |         |              |                 |
| G23 | GTE   | # Days*      | 0             | 29     | 56               | 90               | 118              | 146              | 174              | 272               | 280               | 323             | 348              |         |                  |                  |         |         |         |              | Completed       |
|     |       | ALT          | 20            | 19     | 22               | 17               | 16               | 19               | 17               | 85                | 78                | 98 <sup>1</sup> | 66 <sup>†</sup>  |         |                  |                  |         |         |         |              |                 |
| G24 | GTE   | # Days*      | 0             | 39     | 68               | 99               | 130              | 158              | 189              | 221               | 250               | 272             | 300              | 334     | 365              | 379              | 383     | 393     | 417     |              | Completed       |
|     |       | ALT          | 10            | 9      | 10               | 11               | 11               | 1                | 15               | 12                | 11                | 12              | 18               | 13      | 102 <sup>1</sup> | 888 <sup>†</sup> | 1017    | 343     | 72      |              |                 |
| G25 | GTE   | # Days*      | 0             | 32     | 56               | 84               | 91               | 119              | 140              | 148               |                   |                 |                  |         |                  |                  |         |         |         |              | Withdrawal      |
|     |       | ALT          | 17            | 16     | 93 <sup>1</sup>  | 120 <sup>†</sup> | 78               | 96 <sup>2</sup>  | 85               | 54                |                   |                 |                  |         |                  |                  |         |         |         |              |                 |
| G26 | GTE   | # Days*      | 0             | 29     | 59               | 83               | 91               | 114              | 135              | 150               | 181               | 197             | 280              | 364     |                  |                  |         |         |         |              | Off & Follow-up |
|     |       | ALT          | 23            | 21     | 243 <sup>1</sup> | 92 <sup>†</sup>  | 35               | 124 <sup>2</sup> | 62               | 75                | 137 <sup>3</sup>  | 66              | 54               | 24      |                  |                  |         |         |         |              |                 |
| G27 | GTE   | # Days*      | 0             | 31     | 63               | 79               | 93               | 123              | 137              | 151               | 183               | 199             | 275              | 297     |                  |                  |         |         |         |              | Off & Follow-up |
|     |       | ALT          | 15            | 15     | 95 <sup>1</sup>  | 25 <sup>†</sup>  | 69               | 182 <sup>2</sup> | 96               | 42                | 93 <sup>3</sup>   | 60              | 74               | 30      |                  |                  |         |         |         |              |                 |
| G28 | GTE   | # Days*      | 0             | 31     | 63               | 72               | 85               | 121              | 141              |                   |                   |                 |                  |         |                  |                  |         |         |         |              | Withdrawal      |
|     |       | ALT          | 17            | 16     | 74               | 117 <sup>1</sup> | 28 <sup>†</sup>  | 106 <sup>2</sup> | 58               |                   |                   |                 |                  |         |                  |                  |         |         |         |              |                 |
| G29 | GTE   | # Days*      | 0             | 28     | 56               | 93               | 120              | 141              | 181              | 197               |                   |                 |                  |         |                  |                  |         |         |         |              | Withdrawal      |
|     |       | ALT          | 18            | 20     | 23               | 102 <sup>1</sup> | 107 <sup>†</sup> | 64               | 143 <sup>2</sup> | 83                |                   |                 |                  |         |                  |                  |         |         |         |              |                 |
| G30 | GTE   | # Days*      | 0             | 31     | 56               | 93               | 106              | 118              | 125              | 155               | 174               | 188             | 195              | 209     | 273              | 356              |         |         |         |              | Off & Follow-up |
|     |       | ALT          | 20            | 26     | 22               | 114 <sup>1</sup> | 145 <sup>†</sup> | 74               | 85               | 303 <sup>2</sup>  | 253               | 156             | 107              | 59      | 64               | 35               |         |         |         |              |                 |
| G31 | GTE   | # Days*      | 0             | 28     | 56               | 91               | 119              | 133              | 154              | 185               | 196               | 273             | 367              |         |                  |                  |         |         |         |              | Off & Follow-up |
|     |       | ALT          | 14            | 23     | 31               | 55               | 137 <sup>1</sup> | 66 <sup>†</sup>  | 63               | 96 <sup>2</sup>   | 61                | 41              | 32               |         |                  |                  |         |         |         |              |                 |
| G32 | GTE   | # Days*      | 0             | 29     | 57               | 90               | 121              | 136              | 149              | 215               | 223               | 238             | 275              | 293     | 307              | 365              | 379     |         |         |              | Completed       |
|     |       | ALT          | 14            | 17     | 20               | 59               | 166 <sup>1</sup> | 135 <sup>†</sup> | 43               | 80                | 97 <sup>2</sup>   | 83              | 170 <sup>3</sup> | 95      | 74               | 104 <sup>4</sup> | 66      |         |         |              |                 |
| G33 | GTE   | # Days*      | 0             | 31     | 64               | 93               | 121              | 150              | 164              | 182               | 275               | 294             | 364              |         |                  |                  |         |         |         |              | Off & Follow-up |
|     |       | ALT          | 13            | 17     | 20               | 17               | 67               | 112 <sup>1</sup> | 107 <sup>†</sup> | 37                | 125 <sup>2</sup>  | 69              | 71               |         |                  |                  |         |         |         |              |                 |
| G34 | GTE   | # Days*      | 0             | 29     | 63               | 88               | 121              | 156              | 182              | 212               | 240               | 255             | 281              | 303     | 339              | 358              | 364     |         |         |              | Completed       |
|     |       | ALT          | 26            | 26     | 23               | 34               | 50               | 81               | 86               | 174 <sup>1</sup>  | 95 <sup>†</sup>   | 64              | 69               | 74      | 105 <sup>2</sup> | 77               | 62      |         |         |              |                 |

(Supplemental Table S6 continued)

| ID  | Group | Row variable | Baseline test | Test 1 | Test 2           | Test 3          | Test 4 | Test 5 | Test 6 | Test 7 | Test 8           | Test 9           | Test 10          | Test 11          | Test 12          | Test 13         | Test 14 | Test 15 | Test 16 | Final status |
|-----|-------|--------------|---------------|--------|------------------|-----------------|--------|--------|--------|--------|------------------|------------------|------------------|------------------|------------------|-----------------|---------|---------|---------|--------------|
| G35 | GTE   | # Days*      | 0             | 40     | 57               | 90              | 119    | 151    | 181    | 209    | 272              | 291              | 305              | 366              | 385              | 399             | 413     |         |         | Completed    |
|     |       | ALT          | 18            | 19     | 16               | 15              | 16     | 13     | 22     | 20     | 163 <sup>1</sup> | 167 <sup>†</sup> | 66               | 448 <sup>2</sup> | 239              | 126             | 88      |         |         |              |
| G36 | GTE   | # Days*      | 0             | 30     | 63               | 96              | 126    | 159    | 191    | 220    | 251              | 282              | 310              | 338              | 351              | 365             | 380     |         |         | Completed    |
|     |       | ALT          | 30            | 22     | 29               | 30              | 56     | 41     | 63     | 59     | 73               | 40               | 105 <sup>1</sup> | 109 <sup>†</sup> | 57               | 64              | 34      |         |         |              |
| P01 | PLC   | # Days*      | 0             | 30     | 63               | 84              | 95     | 122    | 151    | 178    | 273              | 364              |                  |                  |                  |                 |         |         |         | Completed    |
|     |       | ALT          | 24            | 54     | 122 <sup>1</sup> | 39 <sup>†</sup> | 37     | 20     | 35     | 31     | 72               | 23               |                  |                  |                  |                 |         |         |         |              |
| P02 | PLC   | # Days*      | 0             | 30     | 63               | 83              | 99     | 133    | 157    | 188    | 254              | 377              |                  |                  |                  |                 |         |         |         | Completed    |
|     |       | ALT          | 43            | 32     | 95 <sup>1</sup>  | 33 <sup>†</sup> | 31     | 32     | 26     | 28     | 33               | 31               |                  |                  |                  |                 |         |         |         |              |
| P03 | PLC   | # Days*      | 0             | 32     | 61               | 85              | 124    | 153    | 182    | 279    | 364              | 377              |                  |                  |                  |                 |         |         |         | Completed    |
|     |       | ALT          | 30            | 38     | 32               | 27              | 35     | 37     | 50     | 51     | 133 <sup>1</sup> | 62 <sup>†</sup>  |                  |                  |                  |                 |         |         |         |              |
| P04 | PLC   | # Days*      | 0             | 30     | 62               | 93              | 127    | 155    | 185    | 211    | 244              | 280              | 308              | 337              | 365              | 381             |         |         |         | Completed    |
|     |       | ALT          | 17            | 15     | 18               | 18              | 23     | 16     | 20     | 15     | 16               | 17               | 17               | 27               | 100 <sup>1</sup> | 31 <sup>†</sup> |         |         |         |              |

GTE, green tea extract; PLC, placebo.

\* Number of days since entry into the study; 0 at baseline screening liver function test.

† All numbers in unshaded cells were ALT values tested at baseline or off-treatment period.

<sup>1</sup> First-time detected ALT > 90 U/L during treatment; green shading indicating the liver function tests were done in during the period of GTE or placebo pill intake.

<sup>2</sup> Second-time detected ALT >90 U/L after ALT returned to below 1.5 times upper limit normal (ULN) and resumed GTE intake.

<sup>3</sup> Third-time detected ALT > 90 U/L after ALT returned to below 1.5 times ULN and resumed GTE intake second time.

<sup>4</sup> Fourth-time detected ALT > 90 U/L after ALT returned to below 1.5 time ULN and resumed GTE intake third time.
