# Supplementary material
Source: PubMed Central journal article supplement (PMC9257888)
Supplement: NIHMS897788-supplement-7.pdf [file NIHMS897788-supplement-7.pdf]

**Supplemental Table S7. Other liver function test results and self-reported symptoms for eight women whose Alanine aminotransferase (ALT) increased above 300 U/L over the course of treatment with GTE or placebo, The Minnesota Green Tea Trial, 2009-2015**

| ID  | Group | Row variable | Baseline test | Test 1 | Test 2 | Test 3 | Test 4 | Test 5 | Test 6 | Test 7 | Test 8 | Test 9 | Test 10 | Test 11 | Test 12 | Test 13 | Test 14 | Test 15 | Test 16 | Final status | Comments     |                                                                                                                                                    |  |  |
|-----|-------|--------------|---------------|--------|--------|--------|--------|--------|--------|--------|--------|--------|---------|---------|---------|---------|---------|---------|---------|--------------|--------------|----------------------------------------------------------------------------------------------------------------------------------------------------|--|--|
| G09 | GTE   | # Days*      | 0             | 31     | 62     | 91     | 111    | 129    | 142    | 183    | 274    | 364    |         |         |         |         |         |         |         |              | Off & Follow | No adverse event or GI symptoms reported.                                                                                                          |  |  |
|     |       | ALT          | 14            | 24     | 23     | 896    | 475†   | 119    | 80     | 72     | 28     | 24     |         |         |         |         |         |         |         |              |              |                                                                                                                                                    |  |  |
|     |       | AST          | 20            | 24     | 23     | 697    | 278    | 88     | 56     | 58     | 30     | 26     |         |         |         |         |         |         |         |              |              |                                                                                                                                                    |  |  |
|     |       | AKP          | 70            | 73     | 70     | 161    | 161    | 110    | 91     | 91     | 82     | 76     |         |         |         |         |         |         |         |              |              |                                                                                                                                                    |  |  |
|     |       | Bilirubin    | 0.4           | 0.5    | 0.4    | 0.5    | 0.5    | 0.6    | 0.5    | 0.6    | 0.4    | 0.6    |         |         |         |         |         |         |         |              |              |                                                                                                                                                    |  |  |
| G11 | GTE   | # Days*      | 0             | 29     | 62     | 91     | 111    | 126    | 168    |        |        |        |         |         |         |         |         |         |         |              | Withdrawal   | No adverse event or GI symptoms reported.                                                                                                          |  |  |
|     |       | ALT          | 12            | 12     | 16     | 483    | 304†   | 136    | 38     |        |        |        |         |         |         |         |         |         |         |              |              |                                                                                                                                                    |  |  |
|     |       | AST          | 15            | 15     | 16     | 194    | 105    | 58     | 23     |        |        |        |         |         |         |         |         |         |         |              |              |                                                                                                                                                    |  |  |
|     |       | AKP          | 64            | 58     | 60     | 78     | 78     | 69     | 77     |        |        |        |         |         |         |         |         |         |         |              |              |                                                                                                                                                    |  |  |
|     |       | Bilirubin    | 0.4           | 0.3    | 0.4    | 0.6    | 0.5    | 0.5    | 0.5    |        |        |        |         |         |         |         |         |         |         |              |              |                                                                                                                                                    |  |  |
| G12 | GTE   | # Days*      | 0             | 31     | 58     | 92     | 112    | 126    | 142    | 199    | 294    | 393    |         |         |         |         |         |         |         |              | Off & Follow | No adverse event or GI symptoms reported.                                                                                                          |  |  |
|     |       | ALT          | 13            | 10     | 17     | 497    | 351†   | 162    | 59     | 26     | 14     | 43     |         |         |         |         |         |         |         |              |              |                                                                                                                                                    |  |  |
|     |       | AST          | 19            | 17     | 23     | 360    | 297    | 120    | 55     | 30     | 19     | 50     |         |         |         |         |         |         |         |              |              |                                                                                                                                                    |  |  |
|     |       | AKP          | 47            | 49     | 50     | 61     | 58     | 54     | 47     | 46     | 42     | 44     |         |         |         |         |         |         |         |              |              |                                                                                                                                                    |  |  |
|     |       | Bilirubin    | 0.4           | 0.5    | 0.6    | 0.7    | 0.7    | 0.7    | 0.5    | 0.8    | 0.6    | 0.6    |         |         |         |         |         |         |         |              |              |                                                                                                                                                    |  |  |
| G17 | GTE   | # Days*      | 0             | 30     | 61     | 99     | 128    | 147    | 160    |        |        |        |         |         |         |         |         |         |         |              | Withdrawal   | Reported abdominal pain                                                                                                                            |  |  |
|     |       | ALT          | 16            | 20     | 22     | 28     | 383    | 399†   | 31     |        |        |        |         |         |         |         |         |         |         |              |              |                                                                                                                                                    |  |  |
|     |       | AST          | 19            | 20     | 22     | 22     | 230    | 510    | 21     |        |        |        |         |         |         |         |         |         |         |              |              |                                                                                                                                                    |  |  |
|     |       | AKP          | 83            | 88     | 89     | 99     | 168    | 168    | 128    |        |        |        |         |         |         |         |         |         |         |              |              |                                                                                                                                                    |  |  |
|     |       | Bilirubin    | 0.8           | 0.9    | 0.8    | 0.5    | 0.9    | 2.3    | 0.7    |        |        |        |         |         |         |         |         |         |         |              |              |                                                                                                                                                    |  |  |
| G19 | GTE   | # Days*      | 0             | 28     | 60     | 95     | 122    | 158    | 188    | 273    | 277    | 387    |         |         |         |         |         |         |         |              | Withdrawal   | Reported increased stress and alcohol intake the day before her elevated liver enzyme blood draw. She has also reported taking Advil and Airborne. |  |  |
|     |       | ALT          | 16            | 18     | 15     | 15     | 19     | 48     | 70     | 2055   | 1762   | 248    |         |         |         |         |         |         |         |              |              |                                                                                                                                                    |  |  |
|     |       | AST          | 18            | 19     | 19     | 17     | 18     | 27     | 37     | 963    | 848    | NA     |         |         |         |         |         |         |         |              |              |                                                                                                                                                    |  |  |
|     |       | AKP          | 53            | 53     | 54     | 53     | 49     | 54     | 52     | 142    | 129    | NA     |         |         |         |         |         |         |         |              |              |                                                                                                                                                    |  |  |
|     |       | Bilirubin    | 0.6           | 0.9    | 0.8    | 0.7    | 0.9    | 0.9    | 1.1    | 1.7    | 2.3    | NA     |         |         |         |         |         |         |         |              |              |                                                                                                                                                    |  |  |
| G24 | GTE   | # Days*      | 0             | 39     | 68     | 99     | 130    | 158    | 189    | 221    | 250    | 272    | 300     | 334     | 365     | 379     | 383     | 393     | 417     |              | Completed    | On her last visit, she reported stomachache when taking the capsules without food; otherwise, taking them with food has been okay.                 |  |  |
|     |       | ALT          | 10            | 9      | 10     | 11     | 11     | 1      | 15     | 12     | 11     | 12     | 18      | 13      | 102     | 888†    | 1017    | 434     | 72      |              |              |                                                                                                                                                    |  |  |
|     |       | AST          | 18            | 15     | 16     | 15     | 17     | 16     | 26     | 17     | 19     | 18     | 21      | 20      | 89      | 706     | 651     | 289     | 76      |              |              |                                                                                                                                                    |  |  |
|     |       | AKP          | 99            | 84     | 97     | 100    | 96     | 98     | 101    | 100    | 94     | 108    | 106     | 101     | 99      | 125     | NA      | 158     | NA      |              |              |                                                                                                                                                    |  |  |
|     |       | Bilirubin    | 0.5           | 0.5    | 0.4    | 0.4    | 0.3    | 0.3    | 0.6    | 0.4    | 0.3    | 0.2    | 0.3     | 0.3     | 0.5     | 0.7     | NA      | 0.8     | NA      |              |              |                                                                                                                                                    |  |  |
| G30 | GTE   | # Days*      | 0             | 31     | 56     | 93     | 106    | 118    | 125    | 155    | 174    | 188    | 195     | 209     | 273     | 356     |         |         |         |              | Off & Follow | Reported nausea                                                                                                                                    |  |  |
|     |       | ALT          | 20            | 26     | 22     | 114    | 145†   | 74     | 85     | 303    | 253    | 156    | 107     | 59      | 64      | 35      |         |         |         |              |              |                                                                                                                                                    |  |  |
|     |       | AST          | 12            | 28     | 27     | 87     | 90     | 54     | 72     | 214    | 137    | 99     | 71      | 46      | 48      | 33      |         |         |         |              |              |                                                                                                                                                    |  |  |
|     |       | AKP          | 38            | 33     | 34     | 47     | 53     | 40     | 44     | 53     | 48     | 46     | 48      | 47      | 43      | 50      |         |         |         |              |              |                                                                                                                                                    |  |  |
|     |       | Bilirubin    | 0.4           | 0.4    | 0.5    | 0.4    | 0.4    | 0.4    | 0.3    | 0.5    | 0.5    | 0.4    | 0.5     | 0.5     | 0.4     | 0.4     |         |         |         |              |              |                                                                                                                                                    |  |  |

**(Supplemental Table S7 continued)**

| New ID | Group | Row variable | Baseline test | Test 1 | Test 2 | Test 3 | Test 4 | Test 5 | Test 6 | Test 7 | Test 8 | Test 9                  | Test 10    | Test 11 | Test 12    | Test 13   | Test 14   | Test 15 | Test 16 | Final status | Comments                                  |
|--------|-------|--------------|---------------|--------|--------|--------|--------|--------|--------|--------|--------|-------------------------|------------|---------|------------|-----------|-----------|---------|---------|--------------|-------------------------------------------|
| G35    | GTE   | # Days*      | 0             | 40     | 57     | 90     | 119    | 151    | 181    | 209    | 272    | 291                     | 305        | 366     | 385        | 399       | 413       |         |         | Completed    | No adverse event or GI symptoms reported. |
|        |       | ALT          | 18            | 19     | 16     | 15     | 16     | 13     | 22     | 20     | 163    | <i>167</i> <sup>†</sup> | <i>66</i>  | 448     | 239        | 126       | 88        |         |         |              |                                           |
|        |       | AST          | 15            | 15     | 16     | 17     | 16     | 15     | 21     | 28     | 82     | <i>67</i>               | <i>34</i>  | 188     | <i>142</i> | <i>63</i> | <i>49</i> |         |         |              |                                           |
|        |       | AKP          | 41            | 43     | 50     | 49     | 45     | 45     | 43     | 45     | 49     | <i>57</i>               | <i>56</i>  | 56      | 56         | 48        | 49        |         |         |              |                                           |
|        |       | Bilirubin    | 0.4           | 0.5    | 0.5    | 0.5    | 0.5    | 0.4    | 0.6    | 0.5    | 0.4    | <i>0.6</i>              | <i>0.6</i> | 0.7     | 0.7        | 0.4       | 0.6       |         |         |              |                                           |

\* Number of days since entry into the study (0 = randomization date)

† Italicized numbers in brown shade were tested during the off-treatment period.

<sup>1</sup> First-time detected ALT > 90 U/L.

<sup>2</sup> Second-time detected ALT > 90 U/L.

<sup>3</sup> Third-time detected ALT > 90 U/L.
